# Supplementary material for: Serotonin and tryptophan metabolites, autoantibodies and gut microbiome in APECED
Source: PubMed Central journal article supplement — Endocr Connect. 2019 Jan 4;8(1):69–77. doi: 10.1530/EC-18-0513 (PMC6365670; doi:10.1530/ec-18-0513), 2019-01-04
Supplement: supplementary_table_1.pdf [file supplementary_table_1.pdf]

Supplemental data. Metabolites levels (nmol/L) according to autoantibodies status

|                                  | HK | NAM | Serotonin | Kynurenine | L-DOPA | KA  | HAA | HIAA | Trp   | AA | IAA  |
|----------------------------------|----|-----|-----------|------------|--------|-----|-----|------|-------|----|------|
| <b>TPH1 Abs -<br/>AADC Abs -</b> | 19 | 312 | 536       | 943        | 10     | 25  | 21  | 83   | 57641 | 8  | 950  |
|                                  | 23 | 148 | 69        | 1107       | 13     | 37  | 26  | 22   | 37267 | 27 | 1796 |
|                                  | 25 | 125 | 1160      | 1226       | 10     | 83  | 33  | 81   | 61080 | 8  | 1432 |
|                                  | 21 | 89  | 870       | 1003       | 11     | 85  | 37  | 75   | 48433 | 6  | 1032 |
|                                  | 46 | 85  | 687       | 1272       | 11     | 117 | 33  | 44   | 49706 | 8  | 1256 |
|                                  | 35 | 104 | 396       | 1313       | 13     | 30  | 35  | 60   | 64107 | 9  | 1486 |
|                                  | 33 | 224 | 851       | 1297       | 13     | 52  | 29  | 95   | 53685 | 10 | 851  |
|                                  | 25 | 103 | 866       | 1093       | 15     | 51  | 23  | 41   | 56294 | 9  | 1131 |
| <b>TPH1 Abs +<br/>AADC Abs -</b> | 27 | 96  | 441       | 960        | 16     | 49  | 31  | 84   | 63525 | 9  | 612  |
|                                  | 94 | 52  | 15        | 2199       | 12     | 90  | 56  | 29   | 52266 | 22 | 1732 |
|                                  | 24 | 163 | 195       | 903        | 9      | 34  | 24  | 23   | 53228 | 27 | 3712 |
| <b>TPH1 Abs -<br/>AADC Abs +</b> | 94 | 150 | 764       | 1814       | 21     | 65  | 34  | 68   | 70833 | 19 | 1343 |
|                                  | 37 | 31  | 686       | 1856       | 9      | 82  | 45  | 90   | 45038 | 8  | 3489 |
|                                  | 24 | 429 | 604       | 1237       | 13     | 49  | 33  | 68   | 57736 | 9  | 2173 |
|                                  | 16 | 144 | 665       | 1108       | 15     | 28  | 15  | 43   | 62312 | 8  | 1027 |
|                                  | 32 | 155 | 713       | 1477       | 14     | 47  | 31  | 75   | 57173 | 13 | 1317 |
| <b>TPH1 Abs +<br/>AADC Abs +</b> | 78 | 92  | 19        | 2339       | 18     | 234 | 60  | 142  | 38011 | 20 | 2129 |
|                                  | 31 | 176 | 180       | 1036       | 11     | 37  | 56  | 30   | 60528 | 15 | 1617 |
|                                  | 62 | 139 | 205       | 2125       | 15     | 134 | 27  | 58   | 67066 | 24 | 1692 |
|                                  | 18 | 88  | 39        | 985        | 14     | 46  | 14  | 12   | 49573 | 9  | 1616 |
|                                  | 33 | 70  | 21        | 1655       | 14     | 31  | 22  | 12   | 58453 | 16 | 1016 |
|                                  | 46 | 221 | 144       | 1051       | 24     | 38  | 39  | 34   | 61234 | 11 | 972  |
|                                  | 28 | 108 | 125       | 1019       | 14     | 40  | 26  | 69   | 47877 | 8  | 1347 |

AA: anthranilic acid; AADC: aromatic L-amino acid decarboxylase; HAA: 3-hydroxyanthranilic acid; HIAA: 5-hydroxyindole-3-acetic acid; HK: 3-hydroxykynurenine; IAA: indole-3-acetic acid; ILA: indole-3-lactic acid; IPA: indole-3-propionic acid; KA: kynurenic acid; NAM: nicotinamide; TPH- 1: tryptophan hydroxylase 1; Trp: Tryptophan
